# Supplementary material for: Ovarian cancer survival by stage, histotype, and pre-diagnostic lifestyle factors, in the prospective UK Million Women Study
Source: PubMed Central journal article supplement (PMC8785125; doi:10.1016/j.canep.2021.102074), 2022-02
Supplement: mmc1.pdf [file mmc1.pdf]

**Ovarian cancer survival by stage, histotype, and pre-diagnostic lifestyle factors, in the prospective UK Million Women Study**

**SUPPLEMENTARY MATERIAL**

**Contents**

|                                                                                                                                                                                                                        |    |
|------------------------------------------------------------------------------------------------------------------------------------------------------------------------------------------------------------------------|----|
| Supplementary Tables.....                                                                                                                                                                                              | 2  |
| Supplementary Table 1: Classification of tumour histological type.....                                                                                                                                                 | 2  |
| Supplementary Table 2: 1, 5, and 10-year ovarian cancer survival, overall and by tumour stage at diagnosis and histological type.....                                                                                  | 9  |
| Supplementary Table 3: Histological type and stage at diagnosis of ovarian cancer cases.....                                                                                                                           | 10 |
| Supplementary Table 4: Tumour characteristics and missing data, by year of diagnosis.....                                                                                                                              | 11 |
| Supplementary Table 5: Additional 1, 5, and 10-year ovarian cancer survival, overall and by tumour stage at diagnosis and histological type, for women who survived the first year after ovarian cancer diagnosis..... | 12 |
| Supplementary Figures.....                                                                                                                                                                                             | 13 |
| Supplementary Figure 1: Survival by time since diagnosis of ovarian cancer.....                                                                                                                                        | 13 |
| Supplementary Figure 2: Ovarian cancer survival by time and histological type in cases diagnosed at (A) Stage I and II and (B) Stage III and IV.....                                                                   | 14 |
| Supplementary Figure 3: The association between BMI (per 5-unit increase) and ovarian cancer survival, by tumour histological type.....                                                                                | 15 |
| Supplementary Figure 4: The association between smoking and ovarian cancer survival, by tumour histological type.....                                                                                                  | 16 |

## Supplementary Tables

### Supplementary Table 1: Classification of tumour histological type

The table shows all ICD-O (International Classification of Diseases for Oncology) codes for ovarian cancer in this study (N=13,222), with the corresponding text diagnoses from ICD-O-2 and three editions of ICD-O-3 (with publication year), and the groupings using in this study. As the number of cases of non-epithelial tumours and unspecified malignant tumours were small, they were grouped with other/ unspecified carcinomas for analysis. Abbreviations: NOS, Not Otherwise Specified. \*The precise number of cases is omitted for cells in which n<5, in accordance with guidance from the Office for National Statistics.

| ICD-O code                               | Cases | ICD-O-2 (1990)                                      | ICD-O-3 (2000)                                          | ICD-O-3.1 (2013)                                        | ICD-O-3.2 (2020)              | Comment                                                                                                                         |
|------------------------------------------|-------|-----------------------------------------------------|---------------------------------------------------------|---------------------------------------------------------|-------------------------------|---------------------------------------------------------------------------------------------------------------------------------|
| <b>EPITHELIAL TUMOURS</b>                |       |                                                     |                                                         |                                                         |                               |                                                                                                                                 |
| <b>Serous borderline tumours (n=514)</b> |       |                                                     |                                                         |                                                         |                               |                                                                                                                                 |
| 84411                                    | <5*   | Code not listed                                     | Code not listed                                         | Code not listed                                         | Code not listed               | Code not listed in any version. Code indicates Serous tumour with borderline suffix, so assumed to be serous borderline tumour. |
| 84421                                    | 17    | Code not listed                                     | Serous cystadenoma, borderline malignancy               | Serous cystadenoma, borderline malignancy               | Serous borderline tumour, NOS |                                                                                                                                 |
| 84423                                    | 357   | Serous cystadenoma, borderline malignancy           | Code not listed                                         | Code not listed                                         | Code not listed               |                                                                                                                                 |
| 84425                                    | 12    | Code not listed                                     | Code not listed                                         | Code not listed                                         | Code not listed               | Code not listed in any version. Closest code is serous cystadenoma of borderline malignancy, so grouped together.               |
| 84513                                    | 12    | Papillary cystadenoma, borderline malignancy        | Code not listed                                         | Code not listed                                         | Code not listed               |                                                                                                                                 |
| 84611                                    | <5*   | Code not listed                                     | Code not listed                                         | Code not listed                                         | Code not listed               | Code not listed in any version. Code indicates Serous tumour with borderline suffix, so assumed to be serous borderline tumour. |
| 84621                                    | 6     | Code not listed                                     | Serous papillary cystic tumour of borderline malignancy | Serous papillary cystic tumour of borderline malignancy | Code not listed               |                                                                                                                                 |
| 84623                                    | 104   | Papillary serous cystadenoma, borderline malignancy | Code not listed                                         | Code not listed                                         | Code not listed               |                                                                                                                                 |
| 84625                                    | <5*   | Code not listed                                     | Code not listed                                         | Code not listed                                         | Code not listed               |                                                                                                                                 |

Ovarian cancer survival in the Million Women Study: Supplementary Material

| Serous carcinomas (n=6068)          |       |                                                       |                                                 |                                                 |                                                 |                                                                                                                                        |
|-------------------------------------|-------|-------------------------------------------------------|-------------------------------------------------|-------------------------------------------------|-------------------------------------------------|----------------------------------------------------------------------------------------------------------------------------------------|
| 84413                               | 3,071 | Serous cystadenocarcinoma NOS                         | Serous cystadenocarcinoma NOS                   | Serous cystadenocarcinoma, NOS                  | Serous carcinoma, NOS                           |                                                                                                                                        |
| 84415                               | <5*   | Code not listed                                       | Code not listed                                 | Code not listed                                 | Code not listed                                 | Code not listed in any version. Closest code is Serous carcinoma, so grouped together.                                                 |
| 84503                               | 37    | Papillary cystadenocarcinoma NOS                      | Papillary cystadenocarcinoma NOS                | Papillary cystadenocarcinoma, NOS               | Papillary cystadenocarcinoma, NOS               |                                                                                                                                        |
| 84603                               | 1,585 | Papillary serous cystadenocarcinoma                   | Papillary serous cystadenocarcinoma             | Papillary serous cystadenocarcinoma             | Low grade serous carcinoma                      |                                                                                                                                        |
| 84609                               | <5*   | Code not listed                                       | Code not listed                                 | Code not listed                                 | Code not listed                                 | Code not listed in any version. Closest code is Serous carcinoma, so grouped together.                                                 |
| 84613                               | 1,364 | Serous surface papillary carcinoma                    | Serous surface papillary carcinoma              | Serous surface papillary carcinoma              | High grade serous carcinoma                     |                                                                                                                                        |
| 90143                               | 7     | Code not listed                                       | Serous adenocarcinofibroma                      | Serous adenocarcinofibroma                      | Serous adenocarcinofibroma                      |                                                                                                                                        |
| Mucinous borderline tumours (n=617) |       |                                                       |                                                 |                                                 |                                                 |                                                                                                                                        |
| 84701                               | <5*   | Code not listed                                       | Mucinous cystic tumour with moderate dysplasia  | Code not listed                                 | Code not listed                                 |                                                                                                                                        |
| 84711                               | <5*   | Code not listed                                       | Code not listed                                 | Code not listed                                 | Code not listed                                 | Code not listed in any version. Code indicates mucinous tumour, with a borderline suffix, so assumed to be mucinous borderline tumour. |
| 84721                               | 40    | Code not listed                                       | Mucinous cystic tumour of borderline malignancy | Mucinous cystic tumour of borderline malignancy | Mucinous cystic tumour of borderline malignancy |                                                                                                                                        |
| 84723                               | 545   | Mucinous cystadenoma, borderline malignancy           | Code not listed                                 | Code not listed                                 | Code not listed                                 |                                                                                                                                        |
| 84725                               | 8     | Code not listed                                       | Code not listed                                 | Code not listed                                 | Code not listed                                 | Code not listed in any version. Closest code is for a mucinous borderline tumour, so grouped together.                                 |
| 84733                               | 21    | Papillary mucinous cystadenoma, borderline malignancy | Code not listed                                 | Code not listed                                 | Code not listed                                 |                                                                                                                                        |
| 84735                               | <5*   | Code not listed                                       | Code not listed                                 | Code not listed                                 | Code not listed                                 | Code not listed in any version. Closest code is for a mucinous borderline tumour, so grouped together.                                 |

Ovarian cancer survival in the Million Women Study: Supplementary Material

| Mucinous carcinomas (n=577)     |     |                                         |                                         |                                         |                                         |                                                                                                                 |
|---------------------------------|-----|-----------------------------------------|-----------------------------------------|-----------------------------------------|-----------------------------------------|-----------------------------------------------------------------------------------------------------------------|
| 84703                           | 235 | Mucinous cystadenocarcinoma NOS         | Mucinous cystadenocarcinoma NOS         | Mucinous cystadenocarcinoma, NOS        | Mucinous cystadenocarcinoma, NOS        |                                                                                                                 |
| 84713                           | 12  | Papillary mucinous cystadenocarcinoma   | Papillary mucinous cystadenocarcinoma   | Papillary mucinous cystadenocarcinoma   | Code not listed                         |                                                                                                                 |
| 84803                           | 296 | Mucinous adenocarcinoma                 | Mucinous adenocarcinoma                 | Mucinous adenocarcinoma                 | Mucinous adenocarcinoma                 |                                                                                                                 |
| 84805                           | <5* | Code not listed                         | Code not listed                         | Code not listed                         | Code not listed                         | Code not listed in any version. Closest code is for a mucinous carcinoma, so grouped together.                  |
| 84813                           | 22  | Mucin-producing adenocarcinoma          | Mucin-producing adenocarcinoma          | Mucin-producing adenocarcinoma          | Mucin-producing adenocarcinoma          |                                                                                                                 |
| 84903                           | 10  | Signet ring cell carcinoma              | Signet ring cell carcinoma              | Signet ring cell carcinoma              | Signet ring cell carcinoma              |                                                                                                                 |
| Endometrioid carcinomas (n=797) |     |                                         |                                         |                                         |                                         |                                                                                                                 |
| 83803                           | 787 | Endometrioid carcinoma                  | Endometrioid adenocarcinoma NOS         | Endometrioid adenocarcinoma NOS         | Endometrioid adenocarcinoma, NOS        |                                                                                                                 |
| 83813                           | <5* | Endometrioid adenofibroma, malignant    | Endometrioid adenofibroma, malignant    | Endometrioid adenofibroma, malignant    | Endometrioid adenofibroma, malignant    |                                                                                                                 |
| 83815                           | <5* | Code not listed                         | Code not listed                         | Code not listed                         | Code not listed                         | Code not listed in any version. Closest code is for a malignant endometrioid adenofibroma, so grouped together. |
| 85703                           | <5* | Adenocarcinoma with squamous metaplasia | Adenocarcinoma with squamous metaplasia | Adenocarcinoma with squamous metaplasia | Adenocarcinoma with squamous metaplasia |                                                                                                                 |
| Clear cell carcinomas (n=517)   |     |                                         |                                         |                                         |                                         |                                                                                                                 |
| 83103                           | 515 | Clear cell adenocarcinoma NOS           | Clear cell adenocarcinoma NOS           | Clear cell adenocarcinoma, NOS          | Clear cell adenocarcinoma, NOS          |                                                                                                                 |
| 83133                           | <5* | Code not listed                         | Clear cell adenocarcinofibroma          | Clear cell adenocarcinofibroma          | Clear cell adenocarcinofibroma          |                                                                                                                 |

Ovarian cancer survival in the Million Women Study: Supplementary Material

| Carcinosarcomas (n=376)                |     |                                                       |                                                            |                                                           |                                                           |                                                                                                           |
|----------------------------------------|-----|-------------------------------------------------------|------------------------------------------------------------|-----------------------------------------------------------|-----------------------------------------------------------|-----------------------------------------------------------------------------------------------------------|
| 89403                                  | <5* | Mixed tumour, malignant NOS                           | Mixed tumour, malignant NOS                                | Mixed tumour, malignant, NOS                              | Mixed tumour, malignant, NOS                              |                                                                                                           |
| 89503                                  | 138 | Mullerian mixed tumour                                | Mullerian mixed tumour                                     | Mullerian mixed tumour                                    | Mullerian mixed tumour                                    |                                                                                                           |
| 89513                                  | 18  | Mesodermal mixed tumour                               | Mesodermal mixed tumour                                    | Mesodermal mixed tumour                                   | Mesodermal mixed tumour                                   |                                                                                                           |
| 89803                                  | 217 | Carcinosarcoma NOS                                    | Carcinosarcoma NOS                                         | Carcinosarcoma, NOS                                       | Carcinosarcoma, NOS                                       |                                                                                                           |
| Other/ unspecified carcinomas (n=3156) |     |                                                       |                                                            |                                                           |                                                           |                                                                                                           |
| 80103                                  | 747 | Carcinoma NOS                                         | Carcinoma NOS                                              | Carcinoma NOS                                             | Carcinoma, NOS                                            |                                                                                                           |
| 80105                                  | <5* | Code not listed                                       | Code not listed                                            | Code not listed                                           | Code not listed                                           | Code not listed in any version. Closest code is for Carcinoma NOS, so grouped together.                   |
| 80203                                  | 49  | Carcinoma, undifferentiated NOS                       | Carcinoma, undifferentiated NOS                            | Carcinoma, undifferentiated, NOS                          | Carcinoma, undifferentiated, NOS                          |                                                                                                           |
| 80209                                  | <5* | Code not listed                                       | Code not listed                                            | Code not listed                                           | Code not listed                                           | Code not listed in any version. Closest code is for Carcinoma, undifferentiated NOS, so grouped together. |
| 80213                                  | 9   | Carcinoma, anaplastic type NOS                        | Carcinoma, anaplastic, NOS                                 | Carcinoma, anaplastic, NOS                                | Carcinoma, anaplastic, NOS                                |                                                                                                           |
| 80223                                  | <5* | Pleomorphic carcinoma                                 | Pleomorphic carcinoma                                      | Pleomorphic carcinoma                                     | Pleomorphic carcinoma                                     |                                                                                                           |
| 80413                                  | 16  | Small cell carcinoma NOS                              | Small cell carcinoma NOS                                   | Small cell carcinoma, NOS                                 | Small cell carcinoma, NOS                                 |                                                                                                           |
| 80503                                  | 33  | Papillary carcinoma NOS                               | Papillary carcinoma NOS                                    | Papillary carcinoma, NOS                                  | Papillary carcinoma, NOS                                  |                                                                                                           |
| 80523                                  | <5* | Papillary squamous cell carcinoma                     | Papillary squamous cell carcinoma                          | Papillary squamous cell carcinoma                         | Papillary squamous cell carcinoma                         |                                                                                                           |
| 80703                                  | 31  | Squamous cell carcinoma NOS                           | Squamous cell carcinoma NOS                                | Squamous cell carcinoma, NOS                              | Squamous cell carcinoma, NOS                              |                                                                                                           |
| 80713                                  | <5* | Squamous cell carcinoma, keratinising NOS             | Squamous cell carcinoma, keratinising NOS                  | Squamous cell carcinoma, keratinizing, NOS                | Squamous cell carcinoma, keratinizing, NOS                |                                                                                                           |
| 80723                                  | <5* | Squamous cell carcinoma, large cell, non-keratinising | Squamous cell carcinoma, large cell, non-keratinising, NOS | Squamous cell carcinoma, large cell, nonkeratinizing, NOS | Squamous cell carcinoma, large cell, nonkeratinizing, NOS |                                                                                                           |

Ovarian cancer survival in the Million Women Study: Supplementary Material

|       |       |                                                   |                                         |                                         |                                         |                                                                                              |
|-------|-------|---------------------------------------------------|-----------------------------------------|-----------------------------------------|-----------------------------------------|----------------------------------------------------------------------------------------------|
| 81203 | 6     | Transitional cell carcinoma NOS                   | Transitional cell carcinoma NOS         | Transitional cell carcinoma, NOS        | Transitional cell carcinoma, NOS        |                                                                                              |
| 81403 | 1,965 | Adenocarcinoma NOS                                | Adenocarcinoma NOS                      | Adenocarcinoma, NOS                     | Adenocarcinoma, NOS                     |                                                                                              |
| 81409 | <5*   | Code not listed                                   | Code not listed                         | Code not listed                         | Code not listed                         | Code not listed in any version. Closest code is for Adenocarcinoma NOS, so grouped together. |
| 81443 | <5*   | Adenocarcinoma, intestinal type                   | Adenocarcinoma, intestinal type         | Adenocarcinoma, intestinal type         | Adenocarcinoma, intestinal type         |                                                                                              |
| 81453 | <5*   | Carcinoma, diffuse type                           | Carcinoma, diffuse type                 | Carcinoma, diffuse type                 | Carcinoma, diffuse type                 |                                                                                              |
| 82303 | <5*   | Solid carcinoma NOS                               | Solid carcinoma NOS                     | Solid carcinoma, NOS                    | Solid carcinoma, NOS                    |                                                                                              |
| 82403 | 29    | Carcinoid tumour NOS (except of appendix M8240/1) | Carcinoid tumour, NOS                   | Carcinoid tumour, NOS                   | Neuroendocrine tumour, NOS              |                                                                                              |
| 82433 | <5*   | Goblet cell carcinoid                             | Goblet cell carcinoid                   | Goblet cell carcinoid                   | Goblet cell carcinoid                   |                                                                                              |
| 82443 | <5*   | Composite carcinoid                               | Composite carcinoid                     | Mixed neuroendocrine carcinoma          | Mixed adenoneuroendocrine carcinoma     |                                                                                              |
| 82463 | 23    | Neuroendocrine carcinoma                          | Neuroendocrine carcinoma, NOS           | Neuroendocrine carcinoma, NOS           | Neuroendocrine carcinoma, NOS           |                                                                                              |
| 82553 | <5*   | Code not listed                                   | Adenocarcinoma with mixed subtypes      | Adenocarcinoma with mixed subtypes      | Adenocarcinoma with mixed subtypes      |                                                                                              |
| 82603 | 138   | Papillary adenocarcinoma NOS                      | Papillary adenocarcinoma NOS            | Papillary adenocarcinoma, NOS           | Papillary adenocarcinoma, NOS           |                                                                                              |
| 82903 | <5*   | Oxyphilic adenocarcinoma                          | Oxyphilic adenocarcinoma                | Oxyphilic adenocarcinoma                | Oxyphilic adenocarcinoma                |                                                                                              |
| 83203 | <5*   | Granular cell carcinoma                           | Granular cell carcinoma                 | Granular cell carcinoma                 | Granular cell carcinoma                 |                                                                                              |
| 83233 | 23    | Mixed cell adenocarcinoma                         | Mixed cell adenocarcinoma               | Mixed cell adenocarcinoma               | Mixed cell adenocarcinoma               |                                                                                              |
| 83403 | <5*   | Papillary carcinoma, follicular variant           | Papillary carcinoma, follicular variant | Papillary carcinoma, follicular variant | Papillary carcinoma, follicular variant |                                                                                              |
| 84013 | <5*   | Apocrine adenocarcinoma                           | Apocrine adenocarcinoma                 | Apocrine adenocarcinoma                 | Apocrine adenocarcinoma                 |                                                                                              |
| 84403 | 49    | Cystadenocarcinoma NOS                            | Cystadenocarcinoma NOS                  | Cystadenocarcinoma, NOS                 | Cystadenocarcinoma, NOS                 |                                                                                              |
| 85503 | <5*   | Acinar cell carcinoma                             | Acinar cell carcinoma                   | Acinar cell carcinoma                   | Acinar cell carcinoma                   |                                                                                              |
| 85603 | <5*   | Adenosquamous carcinoma                           | Adenosquamous carcinoma                 | Adenosquamous carcinoma                 | Adenosquamous carcinoma                 |                                                                                              |
| 90003 | 8     | Brenner tumour, malignant                         | Brenner tumour, malignant               | Brenner tumour, malignant               | Brenner tumour, malignant               |                                                                                              |

Ovarian cancer survival in the Million Women Study: Supplementary Material

| NON-EPITHELIAL TUMOURS (n=149) |     |                                  |                                                   |                                                   |                                                   |                                                                                                                        |
|--------------------------------|-----|----------------------------------|---------------------------------------------------|---------------------------------------------------|---------------------------------------------------|------------------------------------------------------------------------------------------------------------------------|
| 85903                          | <5* | Code not listed                  | Code not listed                                   | Code not listed                                   | Code not listed                                   | Code not listed in any version. Closest code is for Sex cord-gonadal stromal tumour, NOS (85901), so grouped together. |
| 86203                          | 61  | Granulosa cell tumour, malignant | Granulosa cell tumour, malignant                  | Granulosa cell tumour, malignant                  | Adult granulosa cell tumour of ovary              |                                                                                                                        |
| 86313                          | <5* | Code not listed                  | Sertoli-Leydig cell tumour, poorly differentiated | Sertoli-Leydig cell tumour, poorly-differentiated | Sertoli-Leydig cell tumour, poorly differentiated |                                                                                                                        |
| 86503                          | <5* | Leydig cell tumour, malignant    | Leydig cell tumour, malignant                     | Leydig cell tumour-malignant                      | Leydig cell tumour, malignant                     |                                                                                                                        |
| 87213                          | <5* | Nodular melanoma                 | Nodular melanoma                                  | Nodular melanoma                                  | Nodular melanoma                                  |                                                                                                                        |
| 88003                          | 8   | Sarcoma NOS                      | Sarcoma NOS                                       | Sarcoma, NOS                                      | Sarcoma, NOS                                      |                                                                                                                        |
| 88033                          | <5* | Small cell sarcoma               | Small cell sarcoma                                | Small cell sarcoma                                | Small cell sarcoma                                |                                                                                                                        |
| 88103                          | 9   | Fibrosarcoma NOS                 | Fibrosarcoma NOS                                  | Fibrosarcoma, NOS                                 | Fibrosarcoma, NOS                                 |                                                                                                                        |
| 88503                          | <5* | Liposarcoma NOS                  | Liposarcoma NOS                                   | Liposarcoma, NOS                                  | Liposarcoma, NOS                                  |                                                                                                                        |
| 88513                          | <5* | Liposarcoma, well differentiated | Liposarcoma, well differentiated                  | Liposarcoma, well differentiated                  | Liposarcoma, well differentiated, NOS             |                                                                                                                        |
| 88543                          | <5* | Pleomorphic liposarcoma          | Pleomorphic liposarcoma                           | Pleomorphic liposarcoma                           | Pleomorphic liposarcoma                           |                                                                                                                        |
| 88903                          | 31  | Leiomyosarcoma NOS               | Leiomyosarcoma NOS                                | Leiomyosarcoma, NOS                               | Leiomyosarcoma, NOS                               |                                                                                                                        |
| 89003                          | <5* | Rhabdomyosarcoma NOS             | Rhabdomyosarcoma NOS                              | Rhabdomyosarcoma, NOS                             | Rhabdomyosarcoma, NOS                             |                                                                                                                        |
| 89333                          | <5* | Adenosarcoma                     | Adenosarcoma                                      | Adenosarcoma                                      | Adenosarcoma                                      |                                                                                                                        |
| 89363                          | <5* | Code not listed                  | Gastrointestinal stromal sarcoma                  | Gastrointestinal stromal sarcoma                  | Gastrointestinal stromal tumour                   |                                                                                                                        |
| 89633                          | <5* | Rhabdoid sarcoma                 | Malignant rhabdoid tumour                         | Malignant rhabdoid tumour                         | Rhabdoid tumour, NOS                              |                                                                                                                        |
| 89903                          | 5   | Mesenchymoma, malignant          | Mesenchymoma, malignant                           | Mesenchymoma, malignant                           | Mesenchymoma, malignant                           |                                                                                                                        |
| 90643                          | <5* | Germinoma                        | Germinoma                                         | Germinoma                                         | Germinoma                                         |                                                                                                                        |
| 90713                          | <5* | Endodermal sinus tumour          | Yolk sac tumour                                   | Yolk sac tumour                                   | Yolk sac tumour, NOS                              |                                                                                                                        |
| 90803                          | <5* | Teratoma, malignant NOS          | Teratoma, malignant NOS                           | Teratoma, malignant, NOS                          | Teratoma, malignant, NOS                          |                                                                                                                        |

## Ovarian cancer survival in the Million Women Study: Supplementary Material

|                                      |     |                                            |                                        |                                        |                                        |  |
|--------------------------------------|-----|--------------------------------------------|----------------------------------------|----------------------------------------|----------------------------------------|--|
| 90843                                | <5* | Dermoid cyst with malignant transformation | Teratoma with malignant transformation | Teratoma with malignant transformation | Teratoma with malignant transformation |  |
| 90903                                | 5   | Struma ovarii, malignant                   | Struma ovarii, malignant               | Struma ovarii, malignant               | Struma ovarii, malignant               |  |
| 91103                                | <5* | Mesonephroma, malignant                    | Mesonephroma, malignant                | Mesonephroma, malignant                | Mesonephroma, malignant                |  |
| 93643                                | <5* | Peripheral neuroectodermal tumour          | Peripheral neuroectodermal tumour      | Peripheral neuroectodermal tumour      | Ewing sarcoma                          |  |
| <b>MALIGNANT TUMOURS NOS (n=451)</b> |     |                                            |                                        |                                        |                                        |  |
| 80003                                | 443 | Neoplasm, malignant                        | Neoplasm, malignant                    | Neoplasm, malignant                    | Neoplasm, malignant                    |  |
| 80013                                | 6   | Tumour cells, malignant                    | Tumour cells, malignant                | Tumour cells, malignant                | Tumour cells, malignant                |  |
| 80043                                | <5* | Malignant tumour, fusiform cell type       | Malignant tumour, spindle cell type    | Malignant tumour, spindle cell type    | Malignant tumour, spindle cell type    |  |

### References

ICD-O-2 (1990): C. Percy, V. Van Holten, C.S. Muir, International Classification of Diseases for Oncology, 2nd Edition (ICD-O-2), World Health Organization, Geneva, 1990.

ICD-O-3 (2000): A. Fritz, C. Percy, A. Jack, K. Shanmugaratnam, L. Sobin, D. Parkin, S. Whelan, International Classification of Diseases for Oncology, 3rd Edition (ICD-O-3), World Health Organization, Geneva, 2000.

ICD-O-3.1 (2013): A. Fritz, C. Percy, A. Jack, K. Shanmugaratnam, L. Sobin, D. Parkin, S. Whelan, International Classification of Diseases for Oncology, 3rd edition, 1st revision (ICD-O-3.1), World Health Organization, Geneva, 2013.

ICD-O-3.2 (2020): A. Fritz, C. Percy, A. Jack, K. Shanmugaratnam, L. Sobin, D. Parkin, S. Whelan, International Classification of Diseases for Oncology, 3rd Edition, 2nd Revision (ICD-O-3.2), 2020. [http://www.iacr.com.fr/images/Newsflash/ICD-O-3.2\\_final\\_update09102020.xls](http://www.iacr.com.fr/images/Newsflash/ICD-O-3.2_final_update09102020.xls).



**Supplementary Table 2: 1, 5, and 10-year ovarian cancer survival, overall and by tumour stage at diagnosis and histological type**

| Ovarian cancer type                                              | Cases  | % survival at timepoint (95% CI) |             |             |
|------------------------------------------------------------------|--------|----------------------------------|-------------|-------------|
|                                                                  |        | 1 year                           | 5 years     | 10 years    |
| All ovarian cancer                                               | 13,085 | 76% (75-77)                      | 38% (37-39) | 29% (28-30) |
| Fully-malignant ovarian cancer<br>(excluding borderline tumours) | 11,954 | 74% (73-74)                      | 33% (32-34) | 23% (22-24) |
| <b>Stage at diagnosis</b>                                        |        |                                  |             |             |
| Stage I                                                          | 1853   | 97% (97-98)                      | 87% (86-89) | 81% (79-83) |
| Stage II                                                         | 515    | 88% (85-91)                      | 62% (58-67) | 47% (42-52) |
| Stage III                                                        | 3705   | 76% (74-77)                      | 26% (24-27) | 12% (11-14) |
| Stage IV                                                         | 1758   | 61% (58-63)                      | 14% (13-16) | 7% (5-8)    |
| Unknown                                                          | 5254   | 72% (71-73)                      | 36% (35-38) | 28% (27-30) |
| <b>Ovarian cancer histotypes</b>                                 |        |                                  |             |             |
| Serous borderline tumour                                         | 514    | 99% (98-100)                     | 95% (93-97) | 92% (89-95) |
| Mucinous borderline tumour                                       | 617    | 99% (98-100)                     | 97% (95-98) | 96% (94-97) |
| Serous carcinoma                                                 | 6060   | 80% (79-81)                      | 31% (30-32) | 18% (17-19) |
| Mucinous carcinoma                                               | 575    | 81% (77-84)                      | 63% (59-67) | 57% (53-61) |
| Endometrioid carcinoma                                           | 797    | 93% (91-94)                      | 69% (65-72) | 59% (55-63) |
| Clear cell carcinoma                                             | 517    | 85% (82-88)                      | 54% (50-59) | 47% (42-51) |
| Carcinosarcoma                                                   | 376    | 60% (55-65)                      | 21% (17-25) | 17% (13-21) |
| Other/ Unspecified                                               | 3629   | 56% (55-58)                      | 21% (20-23) | 15% (13-16) |

Note: Table shows ovarian cancer-specific survival at 1, 5, and 10 years from diagnosis, calculated using a lifetable approach, for all Million Women Study participants diagnosed with ovarian cancer, after exclusion of 137 cases diagnosed at death (N= 13,085). The above crude survival data is unadjusted for age, stage, or other factors.

**Supplementary Table 3: Histological type and stage at diagnosis of ovarian cancer cases**

| <b>Ovarian cancer: Histological type</b> | <b>Stage I</b>   | <b>Stage II</b> | <b>Stage III</b> | <b>Stage IV</b>  | <b>Total, n</b> |
|------------------------------------------|------------------|-----------------|------------------|------------------|-----------------|
| Serous borderline tumour, % (n)          | 84 (214)         | 6 (14)          | 10 (26)          | 0 (0)            | 254             |
| Mucinous borderline tumour, % (n)        | 96 (290)         | 1 (<5*)         | 2 (5)            | 1 (<5*)          | 301             |
| Serous carcinoma, % (n)                  | 9 (396)          | 6 (269)         | 61 (2613)        | 23 (1002)        | 4280            |
| Mucinous carcinoma, % (n)                | 69 (247)         | 5 (17)          | 18 (64)          | 8 (28)           | 356             |
| Endometrioid carcinoma, % (n)            | 58 (277)         | 16 (76)         | 20 (94)          | 6 (27)           | 474             |
| Clear cell carcinoma, % (n)              | 59 (205)         | 12 (40)         | 23 (80)          | 7 (23)           | 348             |
| Carcinosarcoma, % (n)                    | 14 (30)          | 13 (29)         | 60 (133)         | 14 (30)          | 222             |
| Other / Unspecified, % (n)               | 12 (194)         | 4 (67)          | 43 (690)         | 40 (645)         | 1596            |
| <b>Total, % (n)</b>                      | <b>24 (1853)</b> | <b>7 (515)</b>  | <b>47 (3705)</b> | <b>22 (1758)</b> | <b>7831</b>     |

Note: Cases with unknown stage at diagnosis (n=5386), and cases diagnosed at death (n=137) have been excluded. Table shows row %. \* The precise number of cases is omitted for cells in which n<5, in accordance with guidance from the Office for National Statistics.

**Supplementary Table 4: Tumour characteristics and missing data, by year of diagnosis**

| <b>Tumour characteristic</b>                  | <b>&lt;2005</b> | <b>2005-2009</b> | <b>2010-2014</b> | <b>2015+</b> | <b>Total</b> |
|-----------------------------------------------|-----------------|------------------|------------------|--------------|--------------|
| <b>Stage, % (n)</b>                           |                 |                  |                  |              |              |
| Stage I                                       | 10 (348)        | 13 (421)         | 18 (645)         | 16 (439)     | 14 (1853)    |
| Stage II                                      | 3 (91)          | 3 (107)          | 5 (165)          | 6 (152)      | 4 (515)      |
| Stage III                                     | 16 (590)        | 21 (702)         | 35 (1230)        | 43 (1184)    | 28 (3706)    |
| Stage IV                                      | 7 (243)         | 7 (250)          | 18 (625)         | 23 (644)     | 13 (1762)    |
| Unknown                                       | 65 (2329)       | 56 (1870)        | 24 (851)         | 12 (336)     | 41 (5386)    |
| <b>Tumour histological type, % (n)</b>        |                 |                  |                  |              |              |
| Serous borderline tumour                      | 4 (157)         | 4 (150)          | 4 (132)          | 3 (75)       | 4 (514)      |
| Mucinous borderline tumour                    | 5 (195)         | 5 (164)          | 4 (147)          | 4 (111)      | 5 (617)      |
| Serous carcinoma                              | 34 (1234)       | 41 (1380)        | 51 (1785)        | 61 (1669)    | 46 (6068)    |
| Mucinous carcinoma                            | 6 (212)         | 5 (162)          | 3 (117)          | 3 (86)       | 4 (577)      |
| Endometrioid carcinoma                        | 9 (331)         | 6 (216)          | 4 (151)          | 4 (99)       | 6 (797)      |
| Clear cell carcinoma                          | 5 (178)         | 4 (136)          | 4 (124)          | 3 (79)       | 4 (517)      |
| Carcinosarcoma                                | 3 (96)          | 3 (106)          | 3 (108)          | 2 (66)       | 3 (376)      |
| Other/ Unspecified                            | 33 (1198)       | 31 (1036)        | 27 (952)         | 21 (570)     | 28 (3756)    |
| <b>Tumour grade, % per carcinoma type (n)</b> |                 |                  |                  |              |              |
| <b>Serous carcinoma</b>                       |                 |                  |                  |              |              |
| Grade 1                                       | 4 (50)          | 3 (37)           | 2 (28)           | 0.7 (11)     | 2 (126)      |
| Grade 2                                       | 18 (225)        | 12 (171)         | 4 (63)           | 1 (24)       | 8 (483)      |
| Grade 3                                       | 47 (574)        | 53 (737)         | 42 (753)         | 25 (409)     | 41 (2473)    |
| Unknown                                       | 31 (385)        | 32 (435)         | 53 (941)         | 73 (1225)    | 49 (2986)    |
| <b>Mucinous carcinoma</b>                     |                 |                  |                  |              |              |
| Grade 1                                       | 23 (49)         | 24 (39)          | 33 (39)          | 41 (35)      | 28 (162)     |
| Grade 2                                       | 19 (40)         | 23 (37)          | 27 (32)          | 27 (23)      | 23 (132)     |
| Grade 3                                       | 20 (43)         | 14 (22)          | 12 (14)          | 7 (6)        | 15 (85)      |
| Unknown                                       | 38 (80)         | 40 (64)          | 27 (32)          | 26 (22)      | 34 (198)     |
| <b>Endometrioid carcinoma</b>                 |                 |                  |                  |              |              |
| Grade 1                                       | 10 (34)         | 13 (28)          | 22 (33)          | 28 (28)      | 15 (123)     |
| Grade 2                                       | 24 (79)         | 32 (69)          | 45 (68)          | 44 (44)      | 33 (260)     |
| Grade 3                                       | 35 (116)        | 35 (75)          | 26 (40)          | 17 (17)      | 31 (248)     |
| Unknown                                       | 31 (102)        | 20 (44)          | 7 (10)           | 10 (10)      | 21 (166)     |

Notes: Table shows column %. Grade is only shown for serous, mucinous, and endometrioid carcinomas, as clear cell carcinomas and carcinosarcomas are high grade by definition.

**Supplementary Table 5: Additional 1, 5, and 10-year ovarian cancer survival, overall and by tumour stage at diagnosis and histological type, for women who survived the first year after ovarian cancer diagnosis**

| Ovarian cancer type                                              | Cases | % survival at timepoint (95% CI) |             |             |
|------------------------------------------------------------------|-------|----------------------------------|-------------|-------------|
|                                                                  |       | 1 year                           | 5 years     | 10 years    |
| All ovarian cancer                                               | 9807  | 79% (78-80)                      | 46% (45-47) | 37% (36-39) |
| Fully-malignant ovarian cancer<br>(excluding borderline tumours) | 8692  | 77% (76-77)                      | 40% (39-41) | 30% (29-31) |
| <b>Stage at diagnosis</b>                                        |       |                                  |             |             |
| Stage I                                                          | 1797  | 98% (97-98)                      | 88% (86-90) | 82% (80-84) |
| Stage II                                                         | 449   | 93% (90-95)                      | 64% (59-69) | 51% (45-56) |
| Stage III                                                        | 2793  | 74% (72-76)                      | 27% (25-29) | 15% (13-16) |
| Stage IV                                                         | 1052  | 63% (60-66)                      | 17% (14-19) | 9% (7-12)   |
| Unknown                                                          | 3716  | 77% (76-78)                      | 46% (45-48) | 39% (37-40) |
| <b>Ovarian cancer histotypes</b>                                 |       |                                  |             |             |
| Serous borderline tumour                                         | 507   | 99% (98-100)                     | 95% (93-97) | 93% (90-95) |
| Mucinous borderline tumour                                       | 608   | 99% (98-100)                     | 98% (96-99) | 97% (95-98) |
| Serous carcinoma                                                 | 4845  | 76% (75-77)                      | 32% (31-34) | 21% (20-22) |
| Mucinous carcinoma                                               | 453   | 91% (88-94)                      | 76% (71-80) | 71% (66-75) |
| Endometrioid carcinoma                                           | 739   | 91% (89-93)                      | 71% (68-75) | 61% (57-65) |
| Clear cell carcinoma                                             | 438   | 81% (77-85)                      | 61% (56-66) | 54% (49-59) |
| Carcinosarcoma                                                   | 222   | 65% (59-71)                      | 32% (26-38) | 27% (21-33) |
| Other/ Unspecified                                               | 1995  | 69% (67-71)                      | 33% (31-35) | 25% (23-27) |

Note: Table shows ovarian cancer-specific survival at 1, 5, and 10 years after the first year from diagnosis, calculated using a lifetable approach, for all Million Women Study participants diagnosed with ovarian cancer, after exclusion of 3415 cases who died within the first year (N=9807). The above crude survival data is unadjusted for age, stage, or other factors.

## Supplementary Figures

**Supplementary Figure 1: Survival by time since diagnosis of ovarian cancer**

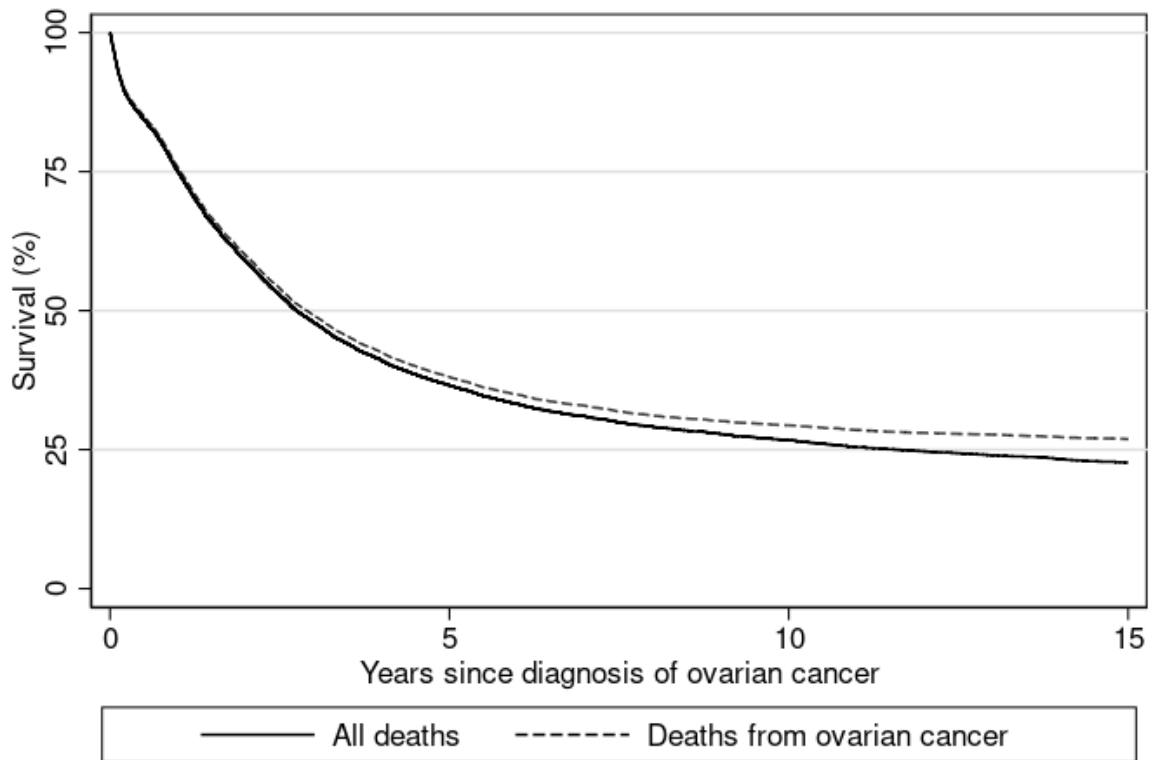

Note: This figure shows the Kaplan-Meier survival curves for survival after diagnosis of ovarian cancer, for all deaths, and for deaths attributed to ovarian cancer, for all Million Women Study participants diagnosed with ovarian cancer, after exclusion of 137 cases diagnosed at death (N= 13,085).

**Supplementary Figure 2: Ovarian cancer survival by time and histological type in cases diagnosed at (A) Stage I and II and (B) Stage III and IV**

(A)

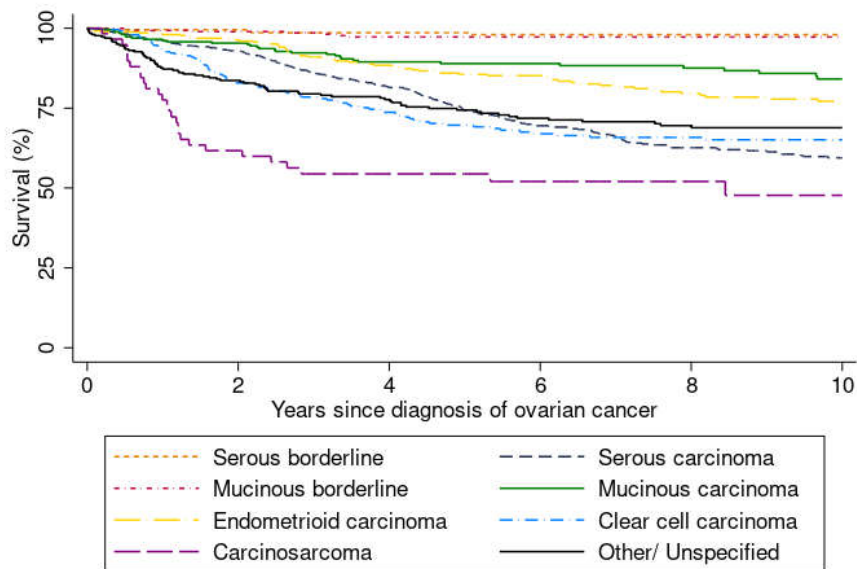

(B)

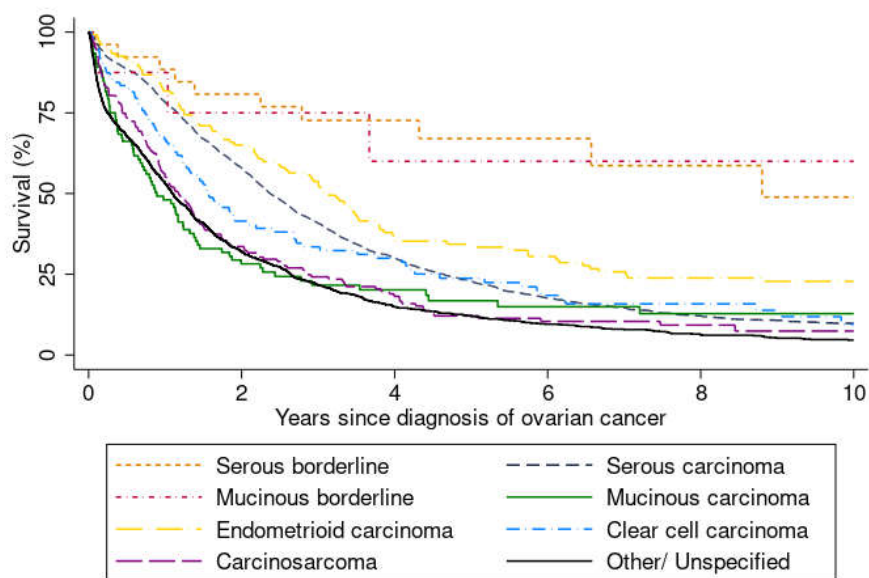

The figure shows the Kaplan-Meier survival curves for survival after diagnosis of ovarian cancer, for deaths attributed to ovarian cancer, by tumour histotype in (A) women diagnosed at Stage I and II and (B) women diagnosed at Stage III and IV, in women with ovarian cancer of known stage (N=7831).

**Supplementary Figure 3: The association between BMI (per 5-unit increase) and ovarian cancer survival, by tumour histological type**

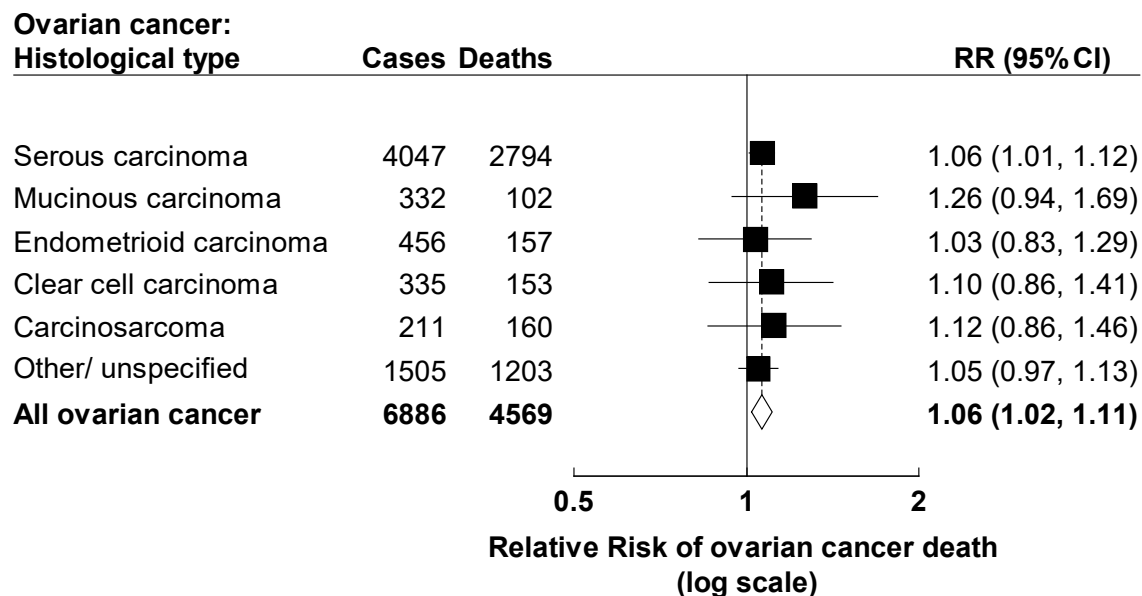

The figure shows the association between body mass index (BMI, per 5-unit increase) and risk of death from ovarian cancer, by tumour histological type, in Million Women Study participants with invasive ovarian cancer of known stage and with known BMI (n=6886). Likelihood ratio test for heterogeneity by histotype: p = 0.9.

**Supplementary Figure 4: The association between smoking and ovarian cancer survival, by tumour histological type**

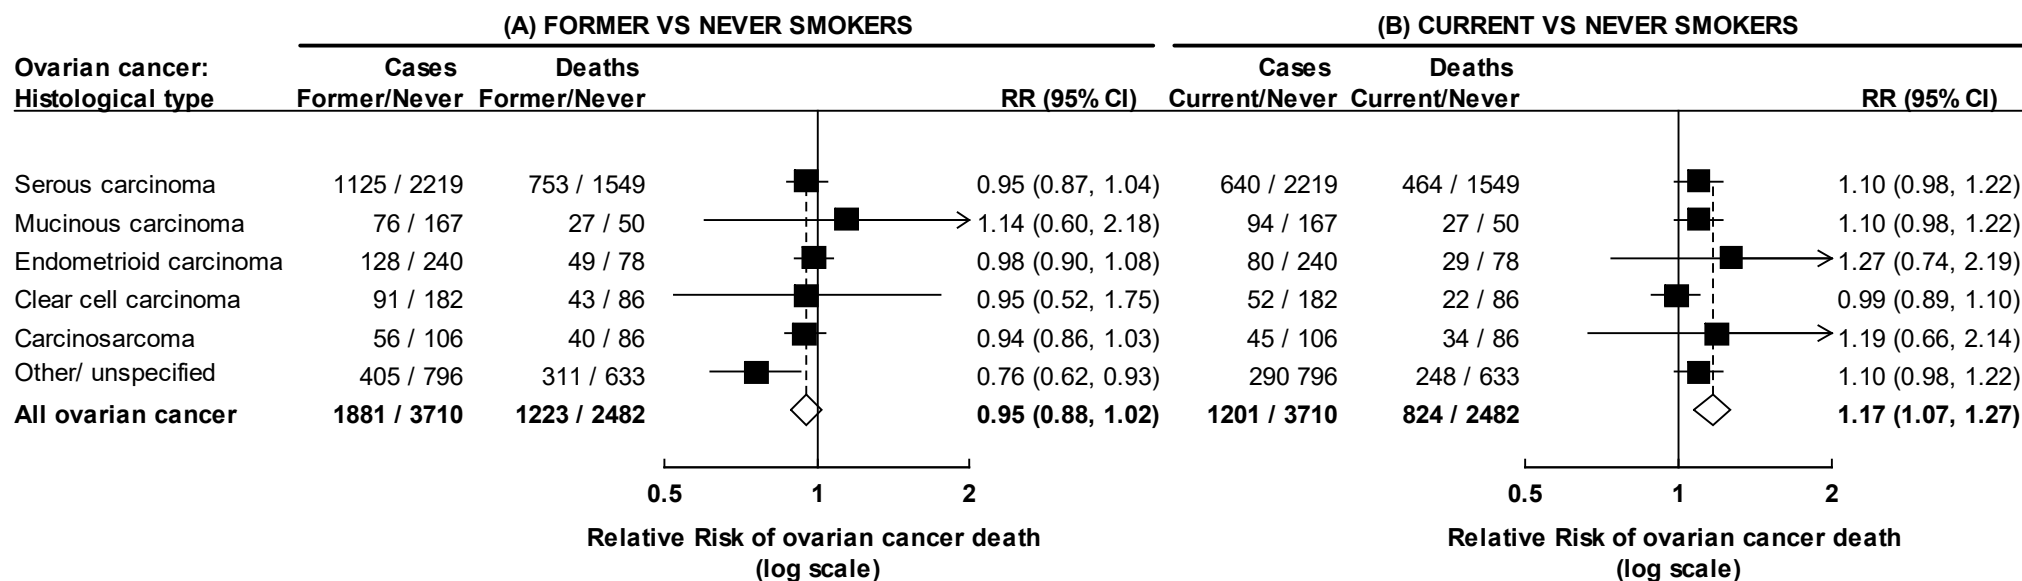

The figure shows the association between smoking (former smokers vs never smokers (A), and current smokers vs never smokers (B)) and risk of death from ovarian cancer, by tumour histological type, in Million Women Study participants with invasive ovarian cancer of known stage and with known smoking history (n=6792). Likelihood ratio test for heterogeneity by histotype: p = 0.6.
